# Supplementary material
Source: PubMed Central journal article supplement (PMC6819815)
Supplement: NIHMS1056289-supplement-Supplemental_table.pdf [file NIHMS1056289-supplement-Supplemental_table.pdf]

**Supplementary Material for the Article:**

Cigarette use trajectories in young adults: analyses of predictors across system levels

**This material supplements, but does not replace, the peer-reviewed paper in**

***Drug and Alcohol Dependence.***

Carla J. Berg<sup>1</sup>, Regine Haardörfer<sup>1</sup>, Milkie Vu<sup>1</sup>, Betelihem Getachew<sup>1</sup>, Steven Lloyd<sup>2</sup>,  
Angela Lanier<sup>3</sup>, Donyale Childs<sup>4</sup>, Yasmeni Sandridge<sup>1</sup>, Jennifer Bierhoff<sup>1</sup>, Jingjing Li<sup>1</sup>,  
Elliyah Dossantos<sup>1</sup>, Michael Windle<sup>1</sup>

<sup>1</sup>Department of Behavioral Sciences and Health Education, Rollins School of Public Health,  
Emory University, 1518 Clifton Rd NE, Atlanta, GA 30322, USA

<sup>2</sup>Department of Psychological Science, University of North Georgia, 82 College Circle,  
Dahlonega, GA 30597, USA

<sup>3</sup>Department of Kinesiology, Berry College, 2277 Martha Berry Hwy NW, Mount Berry, GA  
30149, USA

<sup>4</sup>Department of Nursing, Albany State University, 504 College Drive Albany, GA 31705, USA

**Correspondence:**

Carla J. Berg

Department of Behavioral Sciences and Health Education, Emory University School of Public  
Health, 1518 Clifton Road, NE, Room 524, Atlanta, GA 30322.

Phone: 404-727-7589

Email: [cjberg@emory.edu](mailto:cjberg@emory.edu)

**Supplementary Table 1. GMM Fit Indicators and Average Posterior Probabilities**

| Number of classes | AIC     | BIC     | Entropy | Average posterior probabilities |       |      |       |       |      |  |
|-------------------|---------|---------|---------|---------------------------------|-------|------|-------|-------|------|--|
|                   |         |         |         | 1                               | 2     | 3    | 4     | 5     | 6    |  |
| 1 w/ 40 starts    | 7281.60 | 7311.58 |         |                                 |       |      |       |       |      |  |
| 2 w/40 starts     | 7264.90 | 7312.86 | 0.776   | 93.21                           | 6.79  |      |       |       |      |  |
| 3 w/ 80 starts    | 7263.57 | 7329.52 | 0.650   | 8.20                            | 85.59 | 6.22 |       |       |      |  |
| 4 w/ 40 starts    | 7264.06 | 7348.00 | 0.814   | 90.08                           | 1.81  | 4.76 | 3.34  |       |      |  |
| 5 w/ 80 starts    | 7263.36 | 7365.28 | 0.698   | 4.31                            | 3.78  | 3.67 | 83.25 | 4.99  |      |  |
| 6 w/ 80 starts    | 7262.95 | 7382.86 | 0.683   | 1.40                            | 6.52  | 4.55 | 80.28 | 24.48 | 4.81 |  |

Note: Models with 7 and 8 classes did not converge after more than 15 hours runtime.
